# Supplementary material
Source: PubMed Central journal article supplement (PMC10495923)
Supplement: jama-e2315694-s003.pdf [file jama-e2315694-s003.pdf]

## SUPPLEMENT 3

### SUPPLEMENTARY ONLINE CONTENT

Dargaville PA, Kamlin COF, Orsini F, et al; OPTIMIST-A Trial Investigators. Two-year outcomes after minimally invasive surfactant therapy in preterm infants: follow-up of the OPTIMIST-A randomized clinical trial. *JAMA*. doi:10.1001/jama.2023.15694

**eTable 1.** Definitions of Moderate-Severe Disability by Components and Form of Data Capture

**eTable 2.** Baseline Characteristics by Gestation Strata

**eTable 3.** Key Secondary Outcome and Its Components: Estimated Effect With Additional Adjustments

**eTable 4.** Key Secondary Outcome and Neurodevelopmental Disability Component: Sensitivity Analysis

**eTable 5.** Hospitalizations and Respiratory Health in the First Two Years - Categorical and Continuous Outcomes

**eTable 6.** Key Secondary Outcome and Its Components by Gestation Strata

**eTable 7.** Other Secondary Outcomes by Gestation Strata

**eReferences**

This supplementary material has been provided by the authors to give readers additional information about their work.

**eTable 1. Definitions of moderate-severe neurodevelopmental disability by components and form of data capture**

| Component                               | Form of data capture                                                                                      |                                                                                                 |                                                               |
|-----------------------------------------|-----------------------------------------------------------------------------------------------------------|-------------------------------------------------------------------------------------------------|---------------------------------------------------------------|
|                                         | Face-to-face assessment and BSID-III                                                                      | Parent questionnaire including PARCA-R assessment                                               | Abbreviated questionnaire                                     |
| <b>Cognitive or language impairment</b> | BSID-III <sup>a</sup> standard score <80 for either cognitive composite scale or language composite scale | PARCA-R <sup>b</sup> standard score <70 for either non-verbal cognition or language development | <5 words <sup>c</sup>                                         |
| <b>Cerebral palsy</b>                   | GMFCS level ≥2 on clinical assessment                                                                     | “Walks only with help”, or “doesn’t walk” (± diagnosis of CP)                                   | “Walks only with help”, or “doesn’t walk” (± diagnosis of CP) |
| <b>Visual impairment</b>                | Sees close-up objects at best, even with glasses                                                          | Sees close-up objects at best, even with glasses                                                | Sees close-up objects at best, even with glasses              |
| <b>Hearing impairment</b>               | No useful hearing without amplification, or deaf                                                          | No useful hearing without amplification, or deaf                                                | No useful hearing without amplification, or deaf              |

Abbreviations: BSID-III, Bayley Scales of Infant Development Third Edition; CP, cerebral palsy; GMFCS, Gross Motor Function Classification System; PARCA-R, Parent Report of Children’s Abilities – Revised

<sup>a</sup>BSID-III data included if the assessment was performed between 12 and 36 months corrected age.

<sup>b</sup>All PARCA-R data received in the age range 24-30 months corrected age were included. Normative data for the PARCA-R cognitive and language scales are reported from 24-27 months corrected age.<sup>1</sup> For questionnaires received between 28 and 30 months corrected age, the raw score thresholds used for standard score determination in males and females at 27 months were applied. For PARCA-R questionnaires received beyond 30 months corrected age, if the raw cognitive or language score was below the 27 month threshold for impairment, the data were included; otherwise the data were treated as missing.

<sup>c</sup>Threshold of 5 words as per previous report.<sup>2</sup>

**eTable 2. Baseline characteristics by gestation strata**

|                                                   |                                   | Gestation stratum<br>25-26 weeks |                                | Gestation stratum<br>27-28 weeks |                                  |
|---------------------------------------------------|-----------------------------------|----------------------------------|--------------------------------|----------------------------------|----------------------------------|
|                                                   |                                   | MIST group<br>(N=84)             | Control group<br>(N=83)        | MIST group<br>(N=140)            | Control group<br>(N=146)         |
| Gestation, weeks                                  |                                   | 26.0<br>(25.6–26.4)              | 26.1<br>(25.9–26.6)            | 28.0<br>(27.4–28.4)              | 27.9<br>(27.3–28.4)              |
| Birth weight (g)                                  |                                   | 813<br>(675-931.5)               | 810<br>(730-910)               | 1003<br>(863-1150)               | 990<br>(810-1140)                |
| Birth weight <10 <sup>th</sup> centile            |                                   | 13 (15.5%)                       | 9 (10.8%)                      | 19 (13.6%)                       | 22 (15.1%)                       |
| Female sex                                        |                                   | 41 (48.8%)                       | 53 (63.9%)                     | 67 (47.9%)                       | 67 (45.9%)                       |
| Male sex                                          |                                   | 43 (51.2%)                       | 30 (36.1%)                     | 73 (52.1%)                       | 79 (54.1%)                       |
| Plurality, birth order                            | Singleton                         | 44 (52.4%)                       | 54 (65.1%)                     | 96 (68.6%)                       | 104 (71.2%)                      |
|                                                   | First of multiples                | 16 (19.0%)                       | 12 (14.5%)                     | 24 (17.1%)                       | 18 (12.3%)                       |
|                                                   | Second or subsequent multiple     | 24 (28.6%)                       | 17 (20.5%)                     | 20 (14.3%)                       | 24 (16.4%)                       |
| Exposure to antenatal glucocorticoids             | 2 or more doses prior to delivery | 50 (59.5%)                       | 61 (73.5%)                     | 94 (67.1%)                       | 101 (69.2%)                      |
|                                                   | 1 dose prior to delivery          | 30 (35.7%)                       | 20 (24.1%)                     | 30 (21.4%)                       | 28 (19.2%)                       |
|                                                   | None                              | 4 (4.8%)                         | 2 (2.4%)                       | 16 (11.4%)                       | 17 (11.6%)                       |
| Delivery mode                                     | Vaginal delivery                  | 23 (27.4%)                       | 21 (25.3%)                     | 17 (12.1%)                       | 28 (19.2%)                       |
|                                                   | Cesarean delivery with labour     | 37 (44.0%)                       | 29 (34.9%)                     | 54 (38.6%)                       | 46 (31.5%)                       |
|                                                   | Cesarean delivery, no labour      | 24 (28.6%)                       | 33 (39.8%)                     | 69 (49.3%)                       | 72 (49.3%)                       |
| Apgar score at 5 min                              |                                   | 8 (7–8)                          | 8 (7–9)                        | 8 (7–9)                          | 8 (7–9)                          |
| Apgar score <7 at 5 min                           |                                   | 10 (11.9%)                       | 10 (12.0%)                     | 18 (12.9%)                       | 20 (13.7%)                       |
| Age at randomization (hrs)                        |                                   | 2.3 (1.5-3.5)                    | 2.7 (1.9-3.7)                  | 3.0 (1.8-4.1)                    | 2.4 (1.6-3.6)                    |
| CPAP level at randomization (cm H <sub>2</sub> O) |                                   | 7 (6-8)                          | 7 (6-8)                        | 7 (6-8)                          | 7 (6-8)                          |
| FiO <sub>2</sub> at randomization                 |                                   | 0.35 (0.30-0.40)                 | 0.35 (0.30-0.40)               | 0.35 (0.30-0.39)                 | 0.35 (0.30-0.39)                 |
| FiO <sub>2</sub> ≤0.35                            |                                   | 48 (57.1%)                       | 51 (61.4%)                     | 93 (66.4%)                       | 90 (61.6%)                       |
| Oxygen therapy at home                            |                                   | 10/68 (14.7%)                    | 23/75 (30.7%)                  | 14/127 (11.0%)                   | 23/130 (17.7%)                   |
| Immunized against RSV<br>Influenza                |                                   | 45/63 (71.4%)<br>34/62 (54.8%)   | 50/68 (73.5%)<br>35/68 (51.5%) | 74/112 (66.1%)<br>57/111 (51.4%) | 78/117 (66.7%)<br>69/116 (59.5%) |
| Family history of asthma (in parents or siblings) |                                   | 14/62 (22.6%)                    | 18/71 (25.4%)                  | 36/115 (31.3%)                   | 35/117 (29.9%)                   |
| Corrected age at 2 year assessment (years)        |                                   | 2.07 (2.01-2.25)                 | 2.04 (2.00-2.25)               | 2.03 (2.00-2.11)                 | 2.03 (2.00-2.17)                 |

n (%), n/N (%) or median (interquartile range). Includes infants contributing data to the follow-up study. Complete data available for all pre- and peri-randomization variables; post-discharge data shown for survivors with follow-up data available. Abbreviations: CPAP, continuous positive airway pressure; MIST, minimally invasive surfactant therapy; RSV, respiratory syncytial virus.

**eTable 3. Key secondary outcome and its components: estimated effect with additional adjustments**

| Outcome                                               | MIST group     | Control group  | Adjusted risk difference (%) (95% CI) <sup>a</sup> | Adjusted relative risk (95% CI) <sup>a</sup> |
|-------------------------------------------------------|----------------|----------------|----------------------------------------------------|----------------------------------------------|
| Death or neurodevelopmental disability <sup>b,c</sup> | 78/215 (36.3%) | 79/219 (36.1%) | -0.3 (-7.7 to 7.1)                                 | 0.99 (0.81 to 1.21)                          |
| Death prior to 2 years corrected age                  | 29/224 (12.9%) | 24/229 (10.5%) | 1.7 (-4.4 to 7.8)                                  | 1.14 (0.65 to 1.98)                          |
| Neurodevelopmental disability <sup>b,c</sup>          | 49/186 (26.3%) | 55/195 (28.2%) | -1.4 (-8.6 to 5.8)                                 | 0.95 (0.73 to 1.23)                          |

n/N (%). Abbreviations: CI, confidence interval; MIST, minimally invasive surfactant therapy.

<sup>a</sup>Adjusted for gestation strata, birth weight <10th percentile, sex, mode of delivery, plurality, antenatal glucocorticoid exposure, and 5-minute Apgar score.

<sup>b</sup>Neurodevelopmental disability, defined as any of i) moderate-severe cognitive or language impairment; ii) cerebral palsy equivalent to Gross Motor Function Classification System  $\geq 2^3$ ; iii) visual impairment and iv) hearing impairment. See eTable 1 for further details.

<sup>c</sup>Key secondary outcome not determinable from available follow-up data in 9 of 224 infants in the MIST group and 10 of 229 infants in the control group.

**eTable 4. Key secondary outcome and neurodevelopmental disability component: sensitivity analysis<sup>a</sup>**

| Outcome                                                   | MIST group |                                | Control group |                                | Adjusted relative risk (95% CI) <sup>c</sup> | P value |
|-----------------------------------------------------------|------------|--------------------------------|---------------|--------------------------------|----------------------------------------------|---------|
|                                                           | N          | Outcome incidence <sup>b</sup> | N             | Outcome incidence <sup>b</sup> |                                              |         |
| <b>Death or neurodevelopmental disability<sup>d</sup></b> | 241        | 32.9%                          | 244           | 32.3%                          | 1.01 (0.77 to 1.34)                          | .92     |
| <b>Neurodevelopmental disability<sup>d</sup></b>          | 212        | 23.7%                          | 220           | 24.9%                          | 0.96 (0.67 to 1.36)                          | .81     |

n/N (%). Abbreviations: CI, confidence interval; MIST, minimally invasive surfactant therapy.

<sup>a</sup>Sensitivity analysis using only information collected in the parent questionnaire including PARCA-R assessment.

<sup>b</sup>Incidence estimate from sensitivity analysis, solely using data collected with the parent questionnaire including Parent Report of Children's Abilities – Revised assessment between 24 and 27 months corrected age, with missing data handled using multiple imputation. See Methods for further details.

<sup>c</sup>Adjusted for gestation strata.

<sup>d</sup>Neurodevelopmental disability defined as per eTable 1 and eTable 3.

**eTable 5. Hospitalizations and respiratory health in the first two years - categorical and continuous outcomes**

| Outcome                                                                          |                                        | MIST group               | Control group           |
|----------------------------------------------------------------------------------|----------------------------------------|--------------------------|-------------------------|
| Number of hospitalizations with any illness in first two years                   | 0                                      | 117/194 (60.3%)          | 100/204 (49.0%)         |
|                                                                                  | 1                                      | 40/194 (20.6%)           | 41/204 (20.1%)          |
|                                                                                  | 2                                      | 15/194 (7.7%)            | 24/204 (11.8%)          |
|                                                                                  | 3                                      | 7/194 (3.6%)             | 18/204 (8.8%)           |
|                                                                                  | 4                                      | 5/194 (2.6%)             | 5/204 (2.5%)            |
|                                                                                  | 5                                      | 1/194 (0.5%)             | 3/204 (1.5%)            |
|                                                                                  | >5                                     | 9/194 (4.6%)             | 13/204 (6.4%)           |
| Number of hospitalizations with respiratory illness in first two years           | 0                                      | 146/195 (74.9%)          | 126/204 (61.8%)         |
|                                                                                  | 1                                      | 30/195 (15.4%)           | 31/204 (15.2%)          |
|                                                                                  | 2                                      | 5/195 (2.6%)             | 24/204 (11.8%)          |
|                                                                                  | 3                                      | 3/195 (1.5%)             | 10/204 (4.9%)           |
|                                                                                  | 4                                      | 2/195 (1.0%)             | 4/204 (2.0%)            |
|                                                                                  | 5                                      | 8/195 (4.1%)             | 9/204 (4.4%)            |
|                                                                                  | >5                                     | 1/195 (0.5%)             | 0/204 (0.0%)            |
| Corrected age at first hospitalization with respiratory illness (months)         |                                        | (n=45)<br>4.2 (0.6-10.7) | (n=72)<br>4.7 (1.5-8.9) |
| Diagnosis at first hospitalization with respiratory illness                      | RSV / bronchiolitis                    | 35/49 (71.4%)            | 56/78 (71.8%)           |
|                                                                                  | Other respiratory problem <sup>a</sup> | 14/49 (28.6%)            | 22/78 (28.2%)           |
| Frequency of parent-reported wheezing or breathing difficulty in first two years | No episodes                            | 107/180 (59.4%)          | 90/191 (47.1%)          |
|                                                                                  | Less than once a month                 | 55/180 (30.6%)           | 75/191 (39.3%)          |
|                                                                                  | 1-4 times per month                    | 11/180 (6.1%)            | 16/191 (8.4%)           |
|                                                                                  | 1-6 times per week                     | 2/180 (1.1%)             | 6/191 (3.1%)            |
|                                                                                  | Daily                                  | 5/180 (2.8%)             | 4/191 (2.1%)            |
| Use of bronchodilator therapy in first few years <sup>b</sup>                    | No medication                          | 123/180 (68.3%)          | 111/194 (57.2%)         |
|                                                                                  | Relievers, inhaled                     | 43/180 (23.9%)           | 75/194 (38.7%)          |
|                                                                                  | Preventers, inhaled                    | 10/180 (5.6%)            | 30/194 (15.5%)          |
|                                                                                  | Preventers, oral                       | 10/180 (5.6%)            | 17/194 (8.8%)           |
|                                                                                  | Other medication                       | 9/180 (5.0%)             | 10/194 (5.2%)           |

n/N (%) or median (interquartile range). Percentages may not add up to 100% due to rounding. Abbreviations: CI, confidence interval; MIST, minimally invasive surfactant therapy; RSV; respiratory syncytial virus.

<sup>a</sup>Examples given: croup / pneumonia.

<sup>b</sup>More than one medication could be selected.

**eTable 6. Key secondary outcome and its components by gestation strata**

| Outcome                                             | Gestation stratum | MIST group     | Control group  | Adjusted relative risk (95% CI) <sup>a</sup> | P value for interaction <sup>b</sup> |
|-----------------------------------------------------|-------------------|----------------|----------------|----------------------------------------------|--------------------------------------|
| Death or neurodevelopmental disability <sup>c</sup> | 25-26 weeks       | 38/80 (47.5%)  | 34/79 (43.0%)  | 1.11 (0.86 to 1.42)                          | .29                                  |
|                                                     | 27-28 weeks       | 40/135 (29.6%) | 45/140 (32.1%) | 0.93 (0.74 to 1.17)                          |                                      |
| Death prior to 2 years corrected age                | 25-26 weeks       | 16/84 (19.0%)  | 8/83 (9.6%)    | 1.95 (0.85 to 4.45)                          | .044                                 |
|                                                     | 27-28 weeks       | 13/140 (9.3%)  | 16/146 (11.0%) | 0.86 (0.51 to 1.45)                          |                                      |
| Neurodevelopmental disability <sup>c</sup>          | 25-26 weeks       | 22/64 (34.4%)  | 26/71 (36.6%)  | 0.95 (0.65 to 1.41)                          | .98                                  |
|                                                     | 27-28 weeks       | 27/122 (22.1%) | 29/124 (23.4%) | 0.96 (0.69 to 1.33)                          |                                      |

n/N (%). Abbreviations: CI, confidence interval; MIST, minimally invasive surfactant therapy.

<sup>a</sup>Adjusted for gestation.

<sup>b</sup>Interaction of gestation stratum with treatment allocation in the statistical model.

<sup>c</sup>Neurodevelopmental disability defined as per eTable 1 and eTable 3.

**eTable 7. Other secondary outcomes by gestation strata**

| Outcome                                                 | Gestation stratum | MIST group     | Control group  | Adjusted relative risk (95% CI) <sup>a</sup> | P value for interaction <sup>b</sup> |
|---------------------------------------------------------|-------------------|----------------|----------------|----------------------------------------------|--------------------------------------|
| Cognitive or language impairment                        | 25-26 weeks       | 21/ 64 (32.8%) | 23/ 71 (32.4%) | 1.03 (0.67 to 1.57)                          | .74                                  |
|                                                         | 27-28 weeks       | 21/119 (17.6%) | 24/124 (19.4%) | 0.90 (0.64 to 1.26)                          |                                      |
| Cognitive impairment                                    | 25-26 weeks       | 13/ 60 (21.7%) | 15/ 67 (22.4%) | 0.98 (0.49 to 1.94)                          | .55                                  |
|                                                         | 27-28 weeks       | 13/111 (11.7%) | 19/116 (16.4%) | 0.70 (0.38 to 1.29)                          |                                      |
| Language impairment                                     | 25-26 weeks       | 18/ 59 (30.5%) | 12/ 67 (17.9%) | 1.76 (0.99 to 3.10)                          | .14                                  |
|                                                         | 27-28 weeks       | 11/111 (9.9%)  | 13/113 (11.5%) | 0.86 (0.52 to 1.40)                          |                                      |
| Cerebral palsy                                          | 25-26 weeks       | 3/ 68 (4.4%)   | 9/ 75 (12.0%)  | 0.37 (0.11 to 1.17)                          | .16                                  |
|                                                         | 27-28 weeks       | 6/127 (4.7%)   | 6/129 (4.7%)   | 1.03 (0.54 to 1.96)                          |                                      |
| Visual impairment                                       | 25-26 weeks       | 0/ 68 (0.0%)   | 1/ 75 ( 1.3%)  | Not estimable                                | .46                                  |
|                                                         | 27-28 weeks       | 0/125 (0.0%)   | 4/129 (3.1%)   | Not estimable                                |                                      |
| Hearing impairment                                      | 25-26 weeks       | 1/ 68 (1.5%)   | 2/ 75 (2.7%)   | 0.55 (0.13 to 2.25)                          | .45                                  |
|                                                         | 27-28 weeks       | 3/126 (2.4%)   | 2/130 (1.5%)   | 1.51 (0.22 to 10.60)                         |                                      |
| One or more hospitalizations with any illness           | 25-26 weeks       | 33/ 68 (48.5%) | 35/ 75 (46.7%) | 1.04 (0.73 to 1.48)                          | .040                                 |
|                                                         | 27-28 weeks       | 44/126 (34.9%) | 69/129 (53.5%) | 0.67 (0.54 to 0.83)                          |                                      |
| Three or more hospitalizations with any illness         | 25-26 weeks       | 7/ 68 (10.3%)  | 15/ 75 (20.0%) | 0.51 (0.22 to 1.20)                          | .66                                  |
|                                                         | 27-28 weeks       | 15/126 (11.9%) | 24/129 (18.6%) | 0.64 (0.43 to 0.96)                          |                                      |
| One or more hospitalizations with respiratory illness   | 25-26 weeks       | 20/ 68 (29.4%) | 26/ 75 (34.7%) | 0.85 (0.59 to 1.22)                          | .041                                 |
|                                                         | 27-28 weeks       | 29/127 (22.8%) | 52/129 (40.3%) | 0.59 (0.48 to 0.72)                          |                                      |
| Three or more hospitalizations with respiratory illness | 25-26 weeks       | 3/ 68 (4.4%)   | 8/ 75 (10.7%)  | 0.41 (0.13 to 1.31)                          | .38                                  |
|                                                         | 27-28 weeks       | 11/127 (8.7%)  | 15/129 (11.6%) | 0.78 (0.47 to 1.29)                          |                                      |
| Parent reported wheeze or breathing difficulty          | 25-26 weeks       | 29/ 63 (46.0%) | 34/ 72 (47.2%) | 0.97 (0.72 to 1.32)                          | .039                                 |
|                                                         | 27-28 weeks       | 44/117 (37.6%) | 70/122 (57.4%) | 0.67 (0.54 to 0.83)                          |                                      |



**eTable 7. Other secondary outcomes by gestation strata (continued)**

| Outcome                                          | Gestation stratum | MIST group     | Control group  | Adjusted relative risk (95% CI) <sup>a</sup> | P value for interaction <sup>b</sup> |
|--------------------------------------------------|-------------------|----------------|----------------|----------------------------------------------|--------------------------------------|
| Use of any bronchodilator therapy                | 25-26 weeks       | 24/63 (38.1%)  | 25/ 72 (34.7%) | 1.10 (0.75 to 1.60)                          | .083                                 |
|                                                  | 27-28 weeks       | 33/117 (28.2%) | 58/122 (47.5%) | 0.61 (0.40 to 0.92)                          |                                      |
| Parent report of a physician diagnosis of asthma | 25-26 weeks       | 1/ 63 ( 1.6%)  | 4/ 72 ( 5.6%)  | 0.29 ( 0.04 to 2.37)                         | .79                                  |
|                                                  | 27-28 weeks       | 7/117 ( 6.0%)  | 19/122 (15.6%) | 0.38 ( 0.20 to 0.72)                         |                                      |
| Tube feeding beyond 1 year corrected age         | 25-26 weeks       | 4/ 68 ( 5.9%)  | 1/ 75 ( 1.3%)  | 4.39 ( 0.53 to 36.53)                        | .21                                  |
|                                                  | 27-28 weeks       | 3/126 ( 2.4%)  | 4/130 ( 3.1%)  | 0.76 ( 0.16 to 3.66)                         |                                      |

n/N (%). Abbreviations: CI, confidence interval; MIST, minimally invasive surfactant therapy.

<sup>a</sup>Adjusted for gestation.

<sup>b</sup>Interaction of gestation stratum with treatment allocation in the statistical model.

## eReferences

- (1) Johnson S, Bountziouka V, Brocklehurst P et al. Standardisation of the Parent Report of Children's Abilities-Revised (PARCA-R): a norm-referenced assessment of cognitive and language development at age 2 years. *Lancet Child Adolesc Health* 2019;3:705-712.
- (2) BAPM/RCPCH Working Group. *Classification of Health Status at 2 Years as a Perinatal Outcome. Report of a BAPM/RCPCH Working Group*. London: British Association of Perinatal Medicine, 2008.
- (3) Palisano R, Rosenbaum P, Walter S, Russell D, Wood E, Galuppi B. Development and reliability of a system to classify gross motor function in children with cerebral palsy. *Dev Med Child Neurol* 1997;39:214-223.
