# Supplementary material
Source: PubMed Central journal article supplement (PMC10495923)
Supplement: jama-e2315694-s004.pdf [file jama-e2315694-s004.pdf]

\*Indicates required information. Only first name, last name, and suffix will appear in PubMed.

| <b>*Group Name(s): OPTIMIST-A Trial Investigators</b> |                   |                              |                         |                                                                |                             |                   |                   |
|-------------------------------------------------------|-------------------|------------------------------|-------------------------|----------------------------------------------------------------|-----------------------------|-------------------|-------------------|
| <b>*First Name and Middle Initial(s)</b>              | <b>*Last Name</b> | <b>*Suffix (eg, Jr, III)</b> | <b>Academic Degrees</b> | <b>Institution</b>                                             | <b>Location</b>             | <b>Role</b>       | <b>Subgroup</b>   |
| Brian A                                               | Darlow            |                              | MD                      | University of Otago                                            | Christchurch, New Zealand   | Chair             | DSMC              |
| Michael                                               | Dunn              |                              | MD                      | University of Toronto                                          | Toronto, Canada             | Member            | DSMC              |
| Amy                                                   | Salter            |                              | PhD                     | University of Adelaide                                         | Adelaide, Australia         | Member            | DSMC              |
| Karen                                                 | Butterley         |                              | RN                      | The Royal Hobart Hospital                                      | Hobart, Tasmania, Australia | Trial coordinator | Trial Coordinator |
| Nicky                                                 | Stephens          |                              | MPhil                   | Menzies Institute for Medical Research, University of Tasmania | Hobart, Tasmania, Australia | Trial coordinator | Trial Coordinator |
| Lizzy                                                 | Reid              |                              | MSc                     | Menzies Institute for Medical Research, University of Tasmania | Hobart, Tasmania, Australia | Trial coordinator | Trial Coordinator |
| Ross                                                  | Dunn              |                              | B App Sci               | Murdoch Children's Research Institute                          | Melbourne, Australia        | Data manager      | Data management   |
| Luke                                                  | Stephens          |                              | BSc (Hons)              | Murdoch Children's Research Institute                          | Melbourne, Australia        | Data manager      | Data management   |
| Tammy                                                 | Matzolic          |                              | RN                      | The Royal Hobart Hospital                                      | Hobart, Tasmania, Australia | Research nurse    |                   |
| Brenda                                                | Argus             |                              |                         | The Royal Women's Hospital                                     | Melbourne, Australia        | Research nurse    |                   |
| Emily                                                 | Twitchell         |                              |                         | The Royal Women's Hospital                                     | Melbourne, Australia        | Research nurse    |                   |
| Joanna                                                | Barrotta          |                              |                         | The Royal Women's Hospital                                     | Melbourne, Australia        | Research nurse    |                   |
| Elizabeth                                             | Noble             |                              |                         | Mercy Hospital For Women                                       | Melbourne, Australia        | Research nurse    |                   |
| Kenneth                                               | Tan               |                              |                         | Monash Children's Hospital                                     | Melbourne, Australia        | Co-investigator   |                   |
| Emma                                                  | Yeomans           |                              |                         | Monash Children's Hospital                                     | Melbourne, Australia        | Research nurse    |                   |
| Melissa                                               | Lai               |                              |                         | Royal Brisbane and Women's Hospital                            | Brisbane, Australia         | Co-investigator   |                   |
| Pieter                                                | Koorts            |                              |                         | Royal Brisbane and Women's Hospital                            | Brisbane, Australia         | Co-investigator   |                   |
| Margaret                                              | Broom             |                              |                         | The Canberra Hospital                                          | Canberra, Australia         | Research nurse    |                   |
| Brenda                                                | Law               |                              |                         | Royal Alexandra Hospital                                       | Edmonton, Canada            | Co-investigator   |                   |
| Po-Yin                                                | Cheung            |                              |                         | Royal Alexandra Hospital                                       | Edmonton, Canada            | Co-investigator   |                   |
| Sylvia                                                | Van Os            |                              |                         | Royal Alexandra Hospital                                       | Edmonton, Canada            | Research nurse    |                   |
| Caroline                                              | Fray              |                              |                         | Royal Alexandra Hospital                                       | Edmonton, Canada            | Research nurse    |                   |
| Nicole                                                | Huneault-Purney   |                              |                         | The Ottawa Hospital                                            | Ontario, Canada             | Co-investigator   |                   |
| Melissa                                               | Faulkner          |                              |                         | The Ottawa Hospital                                            | Ontario, Canada             | Co-investigator   |                   |
| Chantal                                               | Horth             |                              |                         | The Ottawa Hospital                                            | Ontario, Canada             | Research nurse    |                   |

## Supplemental Online Content: Nonauthor Collaborators

\*Indicates required information. Only first name, last name, and suffix will appear in PubMed.

| *First Name and Middle Initial(s) | *Last Name       | *Suffix (eg, Jr, III) | Academic Degrees | Institution                                   | Location                   | Role            | Subgroup |
|-----------------------------------|------------------|-----------------------|------------------|-----------------------------------------------|----------------------------|-----------------|----------|
| Rebecca                           | Grimwood         |                       |                  | The Ottawa Hospital                           | Ontario, Canada            | Research nurse  |          |
| A                                 | Riskin           |                       |                  | Bnai Zion Medical Centre                      | Haifa, Israel              | Co-investigator |          |
| Tatiana                           | Kalinina         |                       |                  | Bnai Zion Medical Centre                      | Haifa, Israel              | Research nurse  |          |
| C                                 | Tsafrir          |                       |                  | Ziv Medical Centre                            | Tsfat, Israel              | Research nurse  |          |
| S                                 | Afuta            |                       |                  | Ziv Medical Centre                            | Tsfat, Israel              | Research nurse  |          |
| Fanny                             | Timstut          |                       |                  | Rambam Medical Centre,                        | Haifa, Israel              | Research nurse  |          |
| Sabine                            | Huth             |                       |                  | Starship Child Health, Auckland Hospital      | Auckland, New Zealand      | Research nurse  |          |
| Frances                           | McCaffrey        |                       |                  | Dunedin Hospital                              | Dunedin, New Zealand       | Research nurse  |          |
| Helmut                            | Hummler          |                       |                  | Sidra Medicine                                | Doha, Qatar                | Co-investigator |          |
| Samir                             | Gupta            |                       |                  | Sidra Medicine                                | Doha, Qatar                | Co-investigator |          |
| Mary                              | Dinan            |                       |                  | Sidra Medicine                                | Doha, Qatar                | Research nurse  |          |
| Miriam                            | Casiraghi        |                       |                  | Sidra Medicine                                | Doha, Qatar                | Research nurse  |          |
| Yip Wai                           | Yan              |                       |                  | KK Women's and Children's Hospital            | Singapore                  | Co-investigator |          |
| Krishna R                         | Gopagondanahalli |                       |                  | KK Women's and Children's Hospital            | Singapore                  | Co-investigator |          |
| Suresh                            | Chandran         |                       |                  | KK Women's and Children's Hospital            | Singapore                  | Co-investigator |          |
| Rowena                            | Dela Puerta      |                       |                  | KK Women's and Children's Hospital            | Singapore                  | Research nurse  |          |
| Miha                              | Lučovnik         |                       |                  | University Medical Centre Ljubljana           | Ljubljana, Slovenia        | Co-investigator |          |
| Vlasta L                          | Kurtovič         |                       |                  | University Medical Centre Ljubljana           | Ljubljana, Slovenia        | Research nurse  |          |
| Annelies J                        | Olthuis          |                       |                  | University Medical Centre Ljubljana           | Groningen, The Netherlands | Research nurse  |          |
| Dyvonne H                         | Baptist          |                       |                  | University Medical Centre Groningen           | Groningen, The Netherlands | Research nurse  |          |
| Helene A                          | Bouma            |                       |                  | University Medical Centre Ljubljana           | Groningen, The Netherlands | Research nurse  |          |
| Mehmet                            | Büyüktiryaki     |                       |                  | Zekai Tahir Burak Maternity Teaching Hospital | Ankara, Turkey             | Co-investigator |          |

## Supplemental Online Content: Nonauthor Collaborators

\*Indicates required information. Only first name, last name, and suffix will appear in PubMed.

| *First Name and Middle Initial(s) | *Last Name   | *Suffix (eg, Jr, III) | Academic Degrees | Institution                                           | Location               | Role              | Subgroup |
|-----------------------------------|--------------|-----------------------|------------------|-------------------------------------------------------|------------------------|-------------------|----------|
| Suzan                             | Sahin        |                       |                  | Zekai Tahir Burak Maternity Teaching Hospital         | Ankara, Turkey         | Co-investigator   |          |
| Burcu                             | Cebeci       |                       |                  | Kanuni Sultan Süleyman Training and Research Hospital | Istanbul, Turkey       | Co-investigator   |          |
| Sule                              | Ozdemir      |                       |                  | Kanuni Sultan Süleyman Training and Research Hospital | Istanbul, Turkey       | Research nurse    |          |
| Aylin                             | Vantansever  |                       |                  | Uludağ University Hospital                            | Bursa, Turkey          | Research nurse    |          |
| Lorna                             | McKay        |                       |                  | Royal Hospital for Children                           | Glasgow, UK            | Research nurse    |          |
| Therese                           | McSorley     |                       |                  | Royal Hospital for Children                           | Glasgow, UK            | Research nurse    |          |
| Philippa                          | Crowley      |                       |                  | Princess Anne Hospital                                | Southampton, Hants, UK | Research nurse    |          |
| Jenny                             | Pond         |                       |                  | Princess Anne Hospital                                | Southampton, Hants, UK | Research nurse    |          |
| Christie                          | Mellish      |                       |                  | Princess Anne Hospital                                | Southampton, Hants, UK | Research nurse    |          |
| Rachel M                          | Hayward      |                       |                  | University Hospital of Wales                          | Cardiff, Wales         | Co-investigator   |          |
| Ian P                             | Morris       |                       |                  | University Hospital of Wales                          | Cardiff, Wales         | Co-investigator   |          |
| Sian                              | Elliot       |                       |                  | University Hospital of Wales                          | Cardiff, Wales         | Research nurse    |          |
| Deena-Shefali                     | Patel        |                       |                  | Chelsea and Westminster Hospital NHS Foundation Trust | London, UK             | Co-investigator   |          |
| Izabela                           | Andrzejewska |                       |                  | Chelsea and Westminster Hospital NHS Foundation Trust | London, UK             | Research nurse    |          |
| Amanda                            | Cook         |                       |                  | Singleton Hospital                                    | Swansea, Wales         | Research nurse    |          |
| Sue                               | Wolf         |                       |                  | Northshore University Health System                   | Chicago, USA           | Research nurse    |          |
| Micah                             | Tong         |                       |                  | Kapi'olani Medical Centre for Women and Children      | Hawaii                 | Study coordinator |          |
| Rosanna                           | Ericksen     |                       |                  | LAC + USC Medical Centre                              | Los Angeles, USA       | Research nurse    |          |
| Amanda                            | Logan        |                       |                  | Cooper University Health Care                         | New Jersey, USA        | Research nurse    |          |
| Patricia                          | Niblack      |                       |                  | Cooper University Health Care                         | New Jersey, USA        | Research nurse    |          |
| Rosanna                           | Ericksen     |                       |                  | Good Samaritan Hospital                               | Los Angeles, USA       | Research nurse    |          |
| Zenaida R                         | Tauscher     |                       |                  | Peyton Manning Children's Hospital,                   | Indianapolis, USA      | Co-investigator   |          |
| Pamela                            | Whitlow      |                       |                  | Peyton Manning Children's Hospital,                   | Indianapolis, USA      | Research nurse    |          |
