# Supplementary material
Source: PubMed Central journal article supplement (PMC10495923)
Supplement: jama-e2315694-s005.pdf [file jama-e2315694-s005.pdf]

## Data Sharing Statement

Dargaville. Two-Year Outcomes After Minimally Invasive Surfactant Therapy in Preterm Infants. *JAMA*. Published September 11, 2023. doi:10.1001/jama.2023.15694

### Data

**Data available:** Yes

**Data types:** Deidentified participant data

**How to access data:** Deidentified participant data will be shared upon reasonable request, addressed to the Chief Investigator at [peter.dargaville@ths.tas.gov.au](mailto:peter.dargaville@ths.tas.gov.au)

**When available:** With publication

### Supporting Documents

**Document types:** None

### Additional Information

**Who can access the data:** Researcher whose approved use of the data has been approved.

**Types of analyses:** Post hoc analyses.

**Mechanisms of data availability:** After approval of the proposal.
